# Supplementary material
Source: PubMed Central journal article supplement (PMC7666500)
Supplement: 13018_2020_2059_MOESM3_ESM.pdf [file 13018_2020_2059_MOESM3_ESM.pdf]

# Implementing Weight Loss Before Total Joint Arthroplasty Using A Remote Dietitian and Mobile App: A Randomized, Control Trial

POST-INTERVENTION QUESTIONNAIRE: Standard care group

· This survey asks about your opinions and experiences regarding lifestyle and weight loss. Your responses may help us to improve our intervention for current and future studies at Brigham and Women's Hospital.

· It will take approximately 15 minutes to complete this questionnaire.

· Read each question and answer it as best as you can. Remember, there are no right or wrong answers.

· Your answers will be kept completely confidential. We use a study identification number instead of your name on all our forms.

What is your Study ID number?

---

During the last 3 months, did you actively try to lose weight?

- Yes  
 No

How did you try to lose weight? (check all that apply.)

- Weighing yourself frequently  
 Eating fewer calories  
 Eating less fat  
 Eating less carbs  
 Exercising  
 Eating breakfast daily  
 Working to reduce stress  
 Using meal replacements (liquid shakes or bar from companies like Slim Fast, Optifast, or HMR)  
 Maintaining a consistent eating pattern throughout the week (eating similar food on weekdays and weekends)  
 Using diet pills, laxatives, diuretics, water pills  
 Purging or making yourself vomit  
 Other

Other method:

---

1 Are you currently following a specific diet?

- Yes  
 No

Which diet? (Please check all that apply.)

- Vegetarian or Vegan  
 Atkins Diet  
 South Beach Diet  
 Ornish Diet  
 Paleo Diet  
 Mediterranean Diet  
 Other low carbohydrate diet  
 Other low fat diet  
 My Fitness Pal, Lose it, or another web/mobile app  
 Other (please specify): \_\_\_\_\_

Other diet: \_\_\_\_\_

- 4 Are you currently targeting a daily calorie goal?  Yes  No

If yes, how many calories? \_\_\_\_\_

(calories/day)

- 5 How often do you weigh yourself?  Never  Monthly  Weekly  Daily

- 6 Over the next 3 months, how interested are you in losing weight?

Not interested Very Interested

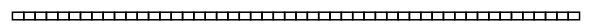

(Place a mark on the scale above)

- 7 Over the next 3 months, how confident are you that you can lose weight?

Not confident Very confident

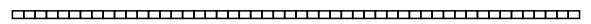

(Place a mark on the scale above)

- 9 How satisfied are you with your current weight?  Very dissatisfied with my weight  Somewhat dissatisfied with my weight  Neither dissatisfied nor satisfied with my weight  Somewhat satisfied with my weight  Very satisfied with my weight

- 10 Please read through each description given below, pick the ONE description that best describes your regular daily activity and select that box (Check only one box).

- I am confined to bed all day.
- I am confined to bed most of the day except for minimal transfer activities (going to the bathroom, etc)  I am either in bed or sitting in a chair most of the day.
- I sit most of the day, except for minimal transfer activities, no walking or standing.
- I sit most of the day, but I stand occasionally and walk a minimal amount in my house. (I may rarely leave the house for an appointment and may require the use of a wheelchair or scooter for transportation.)
- I walk around my house to a moderate degree but I don't leave the house on a regular basis. I may leave the house occasionally for an appointment.
- I walk around my house and go outside at will, walking one or two blocks at a time.
- I walk around my house, go outside at will and walk several blocks at a time without any assistance (weather permitting).
- I am up and about at will in my house and can go out and walk as much as I would like with no restrictions (weather permitting).
- I am up and about at will in my house and outside. I also work outside the house in a minimally active job  I am up and about at will in my house and outside. I also work outside the house in a moderately active job  I am up and about at will in my house and outside. I also work outside the house in an extremely active job
- I am up and about at will in my house and

- outside. I also participate in relaxed physical activity such as jogging, dancing, cycling, swimming occasionally (2-3 times per month)  I am up and about at will in my house and outside. I also participate in relaxed physical activity such as jogging, dancing, cycling, swimming 2-3 times per week  I am up and about at will in my house and outside. I also participate in relaxed physical activity such as jogging, dancing, cycling, swimming daily  I am up and about at will in my house and outside. I also participate in vigorous physical activity such as competitive level sports occasionally (2-3 times per month)  I am up and about at will in my house and outside. I also participate in vigorous physical activity such as competitive level sports occasionally 2-3 times per week  I am up and about at will in my house and outside. I also participate in vigorous physical activity such as competitive level sports daily

**INSTRUCTIONS: This survey asks for your view about your knee. This information will help us keep track of how you feel about your knee and how well you are able to perform your usual activities.**

**Answer every question by ticking the appropriate box, only one box for each question. If you are unsure about how to answer a question, please give the best answer you can.**

### **Symptoms**

**These questions should be answered thinking of your knee symptoms during the last week.**

S1. Do you have swelling in your knee?

- Never  
 Rarely  
 Sometimes  
 Often  
 Always

---

S2. Do you feel grinding, hear clicking or any other type of noise when your knee moves?

- Never
- Rarely
- Sometimes
- Often
- Always

---

S3. Does your knee catch or hang up when moving?

- Never
- Rarely
- Sometimes
- Often
- Always

---

S4. Can you straighten your knee fully?

- Always
- Often
- Sometimes
- Rarely
- Never

---

S5. Can you bend your knee fully?

- Always
- Often
- Sometimes
- Rarely
- Never

---

### Stiffness

**The following questions concern the amount of joint stiffness you have experienced during the last week in your knee. Stiffness is a sensation of restriction or slowness in the ease with which you move your knee joint.**

---

S6. How severe is your knee joint stiffness after first wakening in the morning?

- None
- Mild
- Moderate
- Severe
- Extreme

---

S7. How severe is your knee stiffness after sitting, lying or resting later in the day?

- None
- Mild
- Moderate
- Severe
- Extreme

---

### Pain

---

P1. How often do you experience knee pain?

- Never
- Monthly
- Weekly
- Daily
- Always

**What amount of knee pain have you experienced the last week during the following activities?**

P2. Twisting/pivoting on your knee

- None
- Mild
- Moderate
- Severe
- Extreme

P3. Straightening knee fully

- None
- Mild
- Moderate
- Severe
- Extreme

P4. Bending knee fully

- None
- Mild
- Moderate
- Severe
- Extreme

P5. Walking on flat surface

- None
- Mild
- Moderate
- Severe
- Extreme

P6. Going up or down stairs

- None
- Mild
- Moderate
- Severe
- Extreme

P7. At night while in bed

- None
- Mild
- Moderate
- Severe
- Extreme

P8. Sitting or lying

- None
- Mild
- Moderate
- Severe
- Extreme

P9. Standing upright

- None
- Mild
- Moderate
- Severe
- Extreme

**Function, daily living**

**The following questions concern your physical function. By this we mean your ability to move around and to look after yourself. For each of the following activities please indicate the degree of difficulty you have experienced in the last week due to your knee.**

- A1. Descending stairs
- None
  - Mild
  - Moderate
  - Severe
  - Extreme

- A2. Ascending stairs
- None
  - Mild
  - Moderate
  - Severe
  - Extreme

**For each of the following activities please indicate the degree of difficulty you have experienced in the last week due to your knee.**

- A3. Rising from sitting
- None
  - Mild
  - Moderate
  - Severe
  - Extreme

- A4. Standing
- None
  - Mild
  - Moderate
  - Severe
  - Extreme

- A5. Bending to floor/pick up an object
- None
  - Mild
  - Moderate
  - Severe
  - Extreme

- A6. Walking on flat surface
- None
  - Mild
  - Moderate
  - Severe
  - Extreme

- A7. Getting in/out of car
- None
  - Mild
  - Moderate
  - Severe
  - Extreme

- A8. Going shopping
- None
  - Mild
  - Moderate
  - Severe
  - Extreme

---

A9. Putting on socks/stockings

None  
 Mild  
 Moderate  
 Severe  
 Extreme

---

A10. Rising from bed

None  
 Mild  
 Moderate  
 Severe  
 Extreme

---

A11. Taking off socks/stockings

None  
 Mild  
 Moderate  
 Severe  
 Extreme

---

A12. Lying in bed (turning over, maintaining knee position)

None  
 Mild  
 Moderate  
 Severe  
 Extreme

---

A13. Getting in/out of bath

None  
 Mild  
 Moderate  
 Severe  
 Extreme

---

A14. Sitting

None  
 Mild  
 Moderate  
 Severe  
 Extreme

---

A15. Getting on/off toilet

None  
 Mild  
 Moderate  
 Severe  
 Extreme

---

**For each of the following activities please indicate the degree of difficulty you have experienced in the last week due to your knee.**

A16. Heavy domestic duties (moving heavy boxes, scrubbing floors, etc)

None  
 Mild  
 Moderate  
 Severe  
 Extreme

---

A17. Light domestic duties (cooking, dusting, etc)

None  
 Mild  
 Moderate  
 Severe  
 Extreme

**Function, sports and recreational activities**

The following questions concern your physical function when being active on a higher level. The questions should be answered thinking of what degree of difficulty you have experienced during the last week due to your knee.

SP1. Squatting

None  
 Mild  
 Moderate  
 Severe  
 Extreme

SP2. Running

None  
 Mild  
 Moderate  
 Severe  
 Extreme

SP3. Jumping

None  
 Mild  
 Moderate  
 Severe  
 Extreme

SP4. Twisting/pivoting on your injured knee

None  
 Mild  
 Moderate  
 Severe  
 Extreme

SP5. Kneeling

None  
 Mild  
 Moderate  
 Severe  
 Extreme

**Quality of Life**

Q1. How often are you aware of your knee problem?

Never  
 Monthly  
 Weekly  
 Daily  
 Constantly

Q2. Have you modified your life style to avoid potentially damaging activities to your knee?

Not at all  
 Mildly  
 Moderately  
 Severely  
 Totally

Q3. How much are you troubled with lack of confidence in your knee?

Not at all  
 Mildly  
 Moderately  
 Severely  
 Totally



---

Q4. In general, how much difficulty do you have with your knee?

- None  
 Mild  
 Moderate  
 Severe  
 Extreme
- 

INSTRUCTIONS: This section asks for your view about your hip. This information will help us keep track of how you feel about your hip and how well you are able to do your usual activities. Answer every question by ticking the appropriate circle, only one circle for each question. If you are uncertain about how to answer a question, please give the best answer you can.

---

### Symptoms

---

These questions should be answered thinking of your hip symptoms and difficulties during the last week.

---

S1. Do you feel grinding, hear clicking or any other type of noise from your hip?

- Never  Rarely  Sometimes  Often  Always
- 

S2. Difficulties spreading legs wide apart

- None  Mild  Moderate  Severe  Extreme
- 

S3. Difficulties to stride out when walking

- None  Mild  Moderate  Severe  Extreme
- 

---

### Stiffness

---

The following questions concern the amount of joint stiffness you have experienced during the last week in your hip. Stiffness is a sensation of restriction or slowness in the ease with which you move your hip joint.

---

S4. How severe is your hip joint stiffness after first wakening in the morning?

- None  Mild  Moderate  Severe  Extreme
- 

S5. How severe is your hip stiffness after sitting, lying or resting later in the day?

- None  Mild  Moderate  Severe  Extreme
- 

---

### Pain

---

P1. How often is your hip painful?

- Never  Monthly  Weekly  Daily  Always
- 

What amount of hip pain have you experienced the last week during the following activities?

---

P2. Straightening your hip fully

- None  Mild  Moderate  Severe  Extreme
-

---

P3. Bending your hip fully

None  Mild  Moderate  Severe  Extreme

---

P4. Walking on a flat surface

None  Mild  Moderate  Severe  Extreme

---

P5. Going up or down stairs

None  Mild  Moderate  Severe  Extreme

---

P6. At night while in bed

None  Mild  Moderate  Severe  Extreme

---

P7. Sitting or lying

None  Mild  Moderate  Severe  Extreme

---

P8. Standing upright

None  Mild  Moderate  Severe  Extreme

---

P9. Walking on a hard surface (asphalt, concrete, etc.)

None  Mild  Moderate  Severe  Extreme

---

P10. Walking on an uneven surface

None  Mild  Moderate  Severe  Extreme

---

### **Function, daily living**

The following questions concern your physical function. By this we mean your ability to move around and to look after yourself. For each of the following activities please indicate the degree of difficulty you have experienced in the last week due to your hip.

---

A1. Descending stairs

None  Mild  Moderate  Severe  Extreme

---

A2. Ascending stairs

None  Mild  Moderate  Severe  Extreme

---

A3. Rising from sitting

None  Mild  Moderate  Severe  Extreme

---

**A4. Standing**

None  Mild  Moderate  Severe  Extreme

---

**A5. Bending to the floor/pick up an object**

None  Mild  Moderate  Severe  Extreme

---

**A6. Walking on a flat surface**

None  Mild  Moderate  Severe  Extreme

---

**A7. Getting in/out of car**

None  Mild  Moderate  Severe  Extreme

---

**A8. Going shopping**

None  Mild  Moderate  Severe  Extreme

---

**A9. Putting on socks/stockings**

None  Mild  Moderate  Severe  Extreme

---

**A10. Rising from bed**

None  Mild  Moderate  Severe  Extreme

---

**A11. Taking off socks/stockings**

None  Mild  Moderate  Severe  Extreme

---

**A12. Lying in bed (turning over, maintaining hip position)**

None  Mild  Moderate  Severe  Extreme

---

**A13. Getting in/out of bath**

None  Mild  Moderate  Severe  Extreme

---

**A14. Sitting**

None  Mild  Moderate  Severe  Extreme

---

**A15. Getting on/off toilet**

None  Mild  Moderate  Severe  Extreme

---

**A16. Heavy domestic duties (moving heavy boxes, scrubbing floors, etc.)**

None  Mild  Moderate  Severe  Extreme

A17. Light domestic duties (cooking, dusting, etc.)

- None  Mild  Moderate  Severe  Extreme

### Function, sports and recreational activities

The following questions concern your physical function when being active on a higher level. The questions should be answered thinking of what degree of difficulty you have experienced during the last week due to your hip.

SP1. Squatting

- None  Mild  Moderate  Severe  Extreme

SP2. Running

- None  Mild  Moderate  Severe  Extreme

SP3. Twisting/pivoting on loaded leg

- None  Mild  Moderate  Severe  Extreme

SP4. Walking on uneven surface

- None  Mild  Moderate  Severe  Extreme

### Quality of Life

Q1. How often are you aware of your hip problem?

- Never  Monthly  Weekly  Daily  Constantly

Q2. Have you modified your life style to avoid activities potentially damaging to your hip?

- Not at all  Mildly  Moderately  Severely  Totally

Q3. How much are you troubled with lack of confidence in your hip?

- Not at all  Mildly  Moderately  Severely  Extremely

Q4. In general, how much difficulty do you have with your hip?

- None  Mild  Moderate  Severe  Extreme

### Overall Health

In general, would you say your health is:

- Excellent  
 Very good  
 Good  
 Fair  
 Poor

In general, would you say your quality of life is:

- Excellent  
 Very good  
 Good  
 Fair  
 Poor

---

In general, how would you rate your physical health?

- Excellent
- Very good
- Good
- Fair
- Poor

---

In general, how would you rate your mental health, including your mood and your ability to think?

- Excellent
- Very good
- Good
- Fair
- Poor

---

In general, how would you rate your satisfaction with your social activities and relationships?

- Excellent
- Very good
- Good
- Fair
- Poor

---

In general, please rate how well you carry out your usual social activities and roles. (This includes activities at home, at work and in your community, and responsibilities as a parent, child, spouse, employee, friend, etc.)

- Excellent
- Very good
- Good
- Fair
- Poor

---

To what extent are you able to carry out your everyday physical activities such as walking, climbing stairs, carrying groceries, or moving a chair?

- Completely
- Mostly
- Moderately
- A little
- Not at all

---

In the past 7 days  
How often have you been bothered by emotional problems such as feeling anxious, depressed or irritable?

- Never
- Rarely
- Sometimes
- Often
- Always

---

In the past 7 days  
How would you rate your fatigue on average?

- None
- Mild
- Moderate
- Severe
- Very severe

---

In the past 7 days  
How would you rate your pain on average?

- 0 (No pain)
- 1
- 2
- 3
- 4
- 5
- 6
- 7
- 8
- 9
- 10 (Worst Imaginable Pain)

**How often do you do or experience the following?**

|                                                                                                     | Never do this         | Rarely do this        | Sometimes do this     | Often do this         | Regularly do this as part of my routine |
|-----------------------------------------------------------------------------------------------------|-----------------------|-----------------------|-----------------------|-----------------------|-----------------------------------------|
| I enjoy myself when I exercise.                                                                     | <input type="radio"/> | <input type="radio"/> | <input type="radio"/> | <input type="radio"/> | <input type="radio"/>                   |
| I perform strength training exercises twice a week.                                                 | <input type="radio"/> | <input type="radio"/> | <input type="radio"/> | <input type="radio"/> | <input type="radio"/>                   |
| I am optimistic about the day.                                                                      | <input type="radio"/> | <input type="radio"/> | <input type="radio"/> | <input type="radio"/> | <input type="radio"/>                   |
| I like to try new activities.                                                                       | <input type="radio"/> | <input type="radio"/> | <input type="radio"/> | <input type="radio"/> | <input type="radio"/>                   |
| I have a friend who I know energizes me.                                                            | <input type="radio"/> | <input type="radio"/> | <input type="radio"/> | <input type="radio"/> | <input type="radio"/>                   |
| I have identified at least one activity that brings me joy and energy.                              | <input type="radio"/> | <input type="radio"/> | <input type="radio"/> | <input type="radio"/> | <input type="radio"/>                   |
| I am involved with a group (activity, exercise class, art class, religious affiliation or the like) | <input type="radio"/> | <input type="radio"/> | <input type="radio"/> | <input type="radio"/> | <input type="radio"/>                   |

**How often do you do or experience the following?**

|                                                                                        | Never do this         | Rarely do this        | Sometimes do this     | Often do this         | Regularly do this as part of my routine |
|----------------------------------------------------------------------------------------|-----------------------|-----------------------|-----------------------|-----------------------|-----------------------------------------|
| I eat 4 fruits a day.                                                                  | <input type="radio"/> | <input type="radio"/> | <input type="radio"/> | <input type="radio"/> | <input type="radio"/>                   |
| I eat 5 or more vegetables a day.                                                      | <input type="radio"/> | <input type="radio"/> | <input type="radio"/> | <input type="radio"/> | <input type="radio"/>                   |
| I know proper portions for protein, carbohydrates, and fats, and I eat those portions. | <input type="radio"/> | <input type="radio"/> | <input type="radio"/> | <input type="radio"/> | <input type="radio"/>                   |
| I think about the food that I eat and ask myself if it is good for my body.            | <input type="radio"/> | <input type="radio"/> | <input type="radio"/> | <input type="radio"/> | <input type="radio"/>                   |
| I view food as fuel, as medicine, and enjoyment too.                                   | <input type="radio"/> | <input type="radio"/> | <input type="radio"/> | <input type="radio"/> | <input type="radio"/>                   |

**How often do you do or experience the following?**

|                                                                             | Never do this         | Rarely do this        | Sometimes do this     | Often do this         | Regularly do this as part of my routine |
|-----------------------------------------------------------------------------|-----------------------|-----------------------|-----------------------|-----------------------|-----------------------------------------|
| I set long-term goals for myself, share them with someone, and review them. | <input type="radio"/> | <input type="radio"/> | <input type="radio"/> | <input type="radio"/> | <input type="radio"/>                   |
| I set monthly goals and share them with someone.                            | <input type="radio"/> | <input type="radio"/> | <input type="radio"/> | <input type="radio"/> | <input type="radio"/>                   |
| I set weekly goals and share them with someone.                             | <input type="radio"/> | <input type="radio"/> | <input type="radio"/> | <input type="radio"/> | <input type="radio"/>                   |
| I set daily goals for myself and keep myself accountable for them.          | <input type="radio"/> | <input type="radio"/> | <input type="radio"/> | <input type="radio"/> | <input type="radio"/>                   |

**During the past month, how often did you drink each of the following beverages. A serving is one 8-ounce glass or can of the drink or beverage. If you drink a 16-ounce bottle, please count that as 2 servings.**

|                                                                                         | Less than once per week | Once per week         | 2 to 4 times per week | Nearly daily or daily | Twice or more per day |
|-----------------------------------------------------------------------------------------|-------------------------|-----------------------|-----------------------|-----------------------|-----------------------|
| 100% fruit juice (e.g. apple, grape, orange)                                            | <input type="radio"/>   | <input type="radio"/> | <input type="radio"/> | <input type="radio"/> | <input type="radio"/> |
| Soda with sugar (e.g. Coke, Pepsi, Sprite)                                              | <input type="radio"/>   | <input type="radio"/> | <input type="radio"/> | <input type="radio"/> | <input type="radio"/> |
| Other drink with sugar (e.g. sweetened iced tea, gatorade, fruit punch, fruit cocktail) | <input type="radio"/>   | <input type="radio"/> | <input type="radio"/> | <input type="radio"/> | <input type="radio"/> |
| Diet soda (e.g. Diet Coke, Diet Pepsi, Diet Sprite)                                     | <input type="radio"/>   | <input type="radio"/> | <input type="radio"/> | <input type="radio"/> | <input type="radio"/> |
| Other flavored drink without sugar (e.g. sugar-free iced tea, Crystal Light)            | <input type="radio"/>   | <input type="radio"/> | <input type="radio"/> | <input type="radio"/> | <input type="radio"/> |

- 15 During the past month, on average, how many times did you eat breakfast, lunch, or dinner from fast food restaurants such as McDonald's, Burger King, Wendy's, Arby's, Pizza Hut, or Kentucky Fried Chicken?

- Never     1 to 3 times in the past month  
 1 or 2 times per week  
 3 or 4 times per week  
 5 or 6 times per week  
 7 or more times per week

**During the past month, how often did you eat each of the following foods?**

|                                                                                   | Less than once<br>per week | Once per week         | 2 to 4 times per<br>week | Nearly daily or<br>daily | Twice or more<br>per day |
|-----------------------------------------------------------------------------------|----------------------------|-----------------------|--------------------------|--------------------------|--------------------------|
| Whole milk dairy foods (whole milk, hard cheese, butter, ice cream)               | <input type="radio"/>      | <input type="radio"/> | <input type="radio"/>    | <input type="radio"/>    | <input type="radio"/>    |
| Low-fat milk products (for example, low-fat/skim milk, yogurt, cottage cheese)    | <input type="radio"/>      | <input type="radio"/> | <input type="radio"/>    | <input type="radio"/>    | <input type="radio"/>    |
| Whole grain foods (e.g. whole grain breads, brown rice)                           | <input type="radio"/>      | <input type="radio"/> | <input type="radio"/>    | <input type="radio"/>    | <input type="radio"/>    |
| Pasta, rice, noodles                                                              | <input type="radio"/>      | <input type="radio"/> | <input type="radio"/>    | <input type="radio"/>    | <input type="radio"/>    |
| Baked products (donuts, cookies, muffins, crackers, cakes, sweet rolls, pastries) | <input type="radio"/>      | <input type="radio"/> | <input type="radio"/>    | <input type="radio"/>    | <input type="radio"/>    |
| Deep fried foods (deep fried chicken, fish or seafood, french fries, onion rings) | <input type="radio"/>      | <input type="radio"/> | <input type="radio"/>    | <input type="radio"/>    | <input type="radio"/>    |
| Vegetables (fresh, frozen, or canned)                                             | <input type="radio"/>      | <input type="radio"/> | <input type="radio"/>    | <input type="radio"/>    | <input type="radio"/>    |
| Fruit (fresh, frozen, or canned)                                                  | <input type="radio"/>      | <input type="radio"/> | <input type="radio"/>    | <input type="radio"/>    | <input type="radio"/>    |
| Fish (not fried)                                                                  | <input type="radio"/>      | <input type="radio"/> | <input type="radio"/>    | <input type="radio"/>    | <input type="radio"/>    |

15 Do you currently smoke tobacco on a daily basis, less than daily, or not at all?

- Daily  Less than daily  
 Not at all

18 How often do you have a drink containing alcohol?

- Never  Monthly or less  
 2 to 4 times a month  
 2 to 3 times a week  4 or more times a week

18 How many drinks containing alcohol do you have on a typical day when you are drinking?

- 1 or 2  3 or 4  5 or 6  
 8, or 9  10 or more

20 During the past month, on average, how many hours per day did you spend watching TV or DVDs/Videos?

\_\_\_\_\_ (hours per day)

20 During the past month, on average, how many hours per day did you spend using the computer? (Do not include time spent at work)

\_\_\_\_\_ (hours per day)

21 During the past month, on average, how many hours per week did you spend engaged in walking for leisure?

\_\_\_\_\_ (hours per week)



21 During the past month, on average, how many hours per week did you spend engaged in light or moderate recreational activities or sports such as bowling, yoga, stretching classes, skating, or other similar activities? (Do not include walking.) \_\_\_\_\_  
(hours per week)

21 During the past month, on average, how many hours per week did you spend engaged in vigorous recreational activities or sports such as jogging, swimming, cycling, aerobic dance, skiing, or other similar activities? \_\_\_\_\_  
(hours per week)

21 During the past month, on average, how many hours per week did you spend engaged in resistance training or weight lifting? \_\_\_\_\_  
(hours per week)

22 Do you use any tracking or wearable device to measure your level of physical activity?  Yes  No

23 During the past month, how many hours of sleep do you get in an average 24 hour period? \_\_\_\_\_  
(hours per day)

### How do you feel you were able to achieve the following goals during this study?

|                                                  | Did not select this goal | Did not Achieve       | Somewhat Achieve      | Fully Achieve         |
|--------------------------------------------------|--------------------------|-----------------------|-----------------------|-----------------------|
| Increase vegetables and fruits intake.           | <input type="radio"/>    | <input type="radio"/> | <input type="radio"/> | <input type="radio"/> |
| Increase whole grains intake.                    | <input type="radio"/>    | <input type="radio"/> | <input type="radio"/> | <input type="radio"/> |
| Decrease daily calorie count                     | <input type="radio"/>    | <input type="radio"/> | <input type="radio"/> | <input type="radio"/> |
| Decrease fast-food intake.                       | <input type="radio"/>    | <input type="radio"/> | <input type="radio"/> | <input type="radio"/> |
| Decrease sugar-sweetened beverages (SSB) intake. | <input type="radio"/>    | <input type="radio"/> | <input type="radio"/> | <input type="radio"/> |
| Increase number of steps/day.                    | <input type="radio"/>    | <input type="radio"/> | <input type="radio"/> | <input type="radio"/> |
| Increase moderate physical activity.             | <input type="radio"/>    | <input type="radio"/> | <input type="radio"/> | <input type="radio"/> |
| Decrease screen time.                            | <input type="radio"/>    | <input type="radio"/> | <input type="radio"/> | <input type="radio"/> |
| Optimize sleep duration.                         | <input type="radio"/>    | <input type="radio"/> | <input type="radio"/> | <input type="radio"/> |
| Other.                                           | <input type="radio"/>    | <input type="radio"/> | <input type="radio"/> | <input type="radio"/> |

Other goal: \_\_\_\_\_

**Select the best response that reflects your opinion.**

|                                                                                   | Strongly Disagree     | Disagree              | Neither Agree nor Disagree | Agree                 | Strongly Agree        |
|-----------------------------------------------------------------------------------|-----------------------|-----------------------|----------------------------|-----------------------|-----------------------|
| I would do a study like this again.                                               | <input type="radio"/> | <input type="radio"/> | <input type="radio"/>      | <input type="radio"/> | <input type="radio"/> |
| I would recommend a study like this to another person.                            | <input type="radio"/> | <input type="radio"/> | <input type="radio"/>      | <input type="radio"/> | <input type="radio"/> |
| I would encourage Brigham and Women's to have an ongoing program like this study. | <input type="radio"/> | <input type="radio"/> | <input type="radio"/>      | <input type="radio"/> | <input type="radio"/> |

- 3 Have you seen a dietitian or nutritionist in the last three months?  Yes  
 No

**If you saw a registered dietitian or nutritionist in the last three months, how would you describe your experience? Please skip this question if you did not see a dietitian.**

|                                                                                                                                     | Strongly Disagree     | Somewhat Disagree     | Somewhat Agree        | Strongly Agree        |
|-------------------------------------------------------------------------------------------------------------------------------------|-----------------------|-----------------------|-----------------------|-----------------------|
| The registered dietitian (RD) was helpful in selecting and setting goals for myself.                                                | <input type="radio"/> | <input type="radio"/> | <input type="radio"/> | <input type="radio"/> |
| The RD was helpful to keep me motivated.                                                                                            | <input type="radio"/> | <input type="radio"/> | <input type="radio"/> | <input type="radio"/> |
| The RD was helpful to measure and monitor my lifestyle goals.                                                                       | <input type="radio"/> | <input type="radio"/> | <input type="radio"/> | <input type="radio"/> |
| The RD helped me to face problems and find solutions.                                                                               | <input type="radio"/> | <input type="radio"/> | <input type="radio"/> | <input type="radio"/> |
| If given the choice, I would have preferred meeting with the RD remotely by video, phone, or in-app rather than doing so in person. | <input type="radio"/> | <input type="radio"/> | <input type="radio"/> | <input type="radio"/> |
